# Supplementary material for: Multicolor tunable Bi3+,Sm3+ co-doped Sr2GdGaO5 phosphor and its application in optical thermometry
Source: Royal Society of Chemistry journal article supplement (doi:10.1039/d3tc02434b), 2023-01-01
Supplement: d3tc02434b1.pdf [file d3tc02434b1.pdf]

## Supporting information

### **Multicolor tunable Bi<sup>3+</sup>, Sm<sup>3+</sup> co-doped Sr<sub>2</sub>GdGaO<sub>5</sub> phosphors and its application in optical thermometry**

Kangrui Qiang <sup>a</sup>, Yingqiang Yu <sup>a</sup>, Yulong Ye <sup>a</sup>, Liang Liang <sup>a</sup>, Qinan Mao <sup>a</sup>, Yang Ding <sup>a</sup>,

Yiwen Zhu <sup>a</sup>, Meijiao Liu <sup>b</sup>, Jiasong Zhong <sup>a,\*</sup>

<sup>a</sup>Center of Advanced Optoelectronic Materials, College of Materials and Environmental Engineering, Hangzhou

Dianzi University, Hangzhou 310018, China

<sup>b</sup>Key Laboratory of Surface & Interface Science of Polymer Materials of Zhejiang Province, School of Chemistry and Chemical Engineering, Zhejiang Sci-Tech University, Hangzhou 310018, China

Corresponding author:

E-mail: [jiasongzhong@hdu.edu.cn](mailto:jiasongzhong@hdu.edu.cn) (J.S. Zhong)

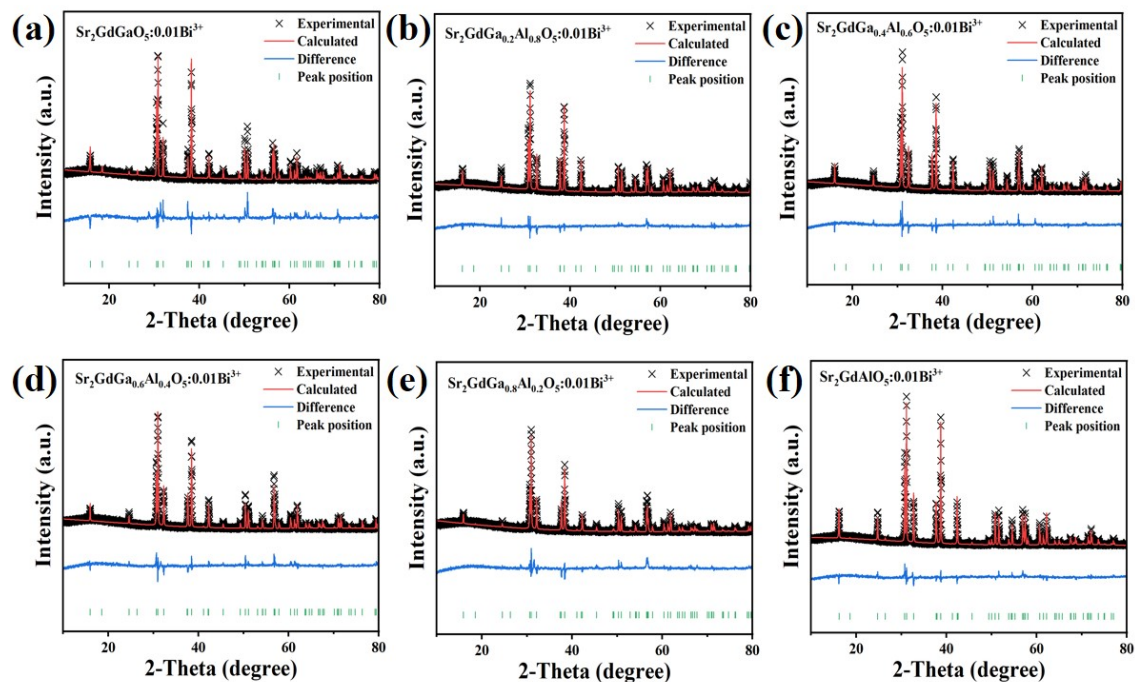

Fig. S1 (a-f) Rietveld refinement patterns of  $\text{Sr}_2\text{GdGa}_{1-z}\text{Al}_z\text{O}_5$  ( $z=0,0.2,0.4,0.6,0.8,1$ ) phosphors.

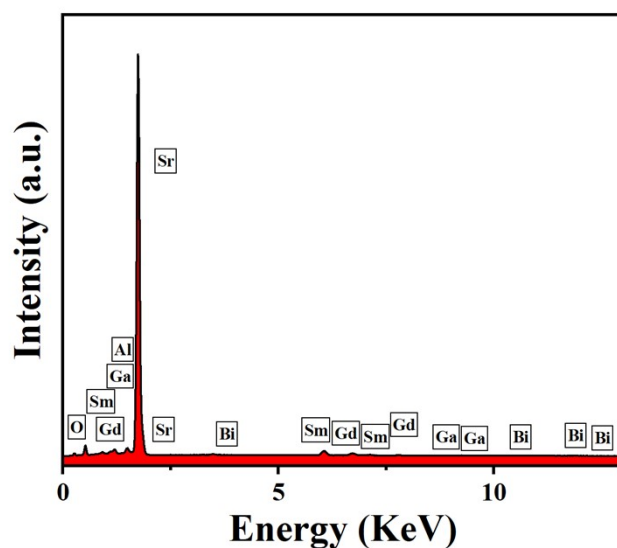

Fig. S2 EDS spectrum of SGGAO phosphor.

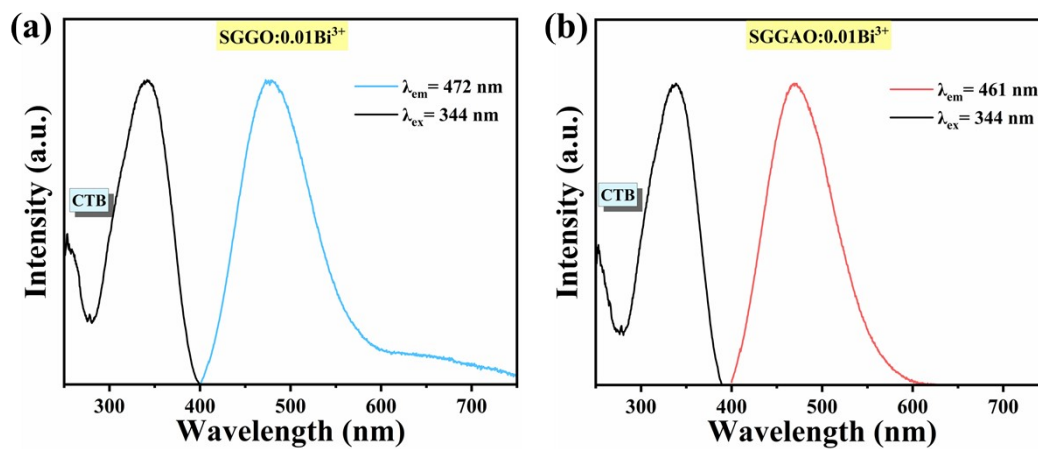

Fig. S3 The PL and PLE spectra of (a) SGGO:Bi<sup>3+</sup> and (b)SGGAO:Bi<sup>3+</sup> phosphors.

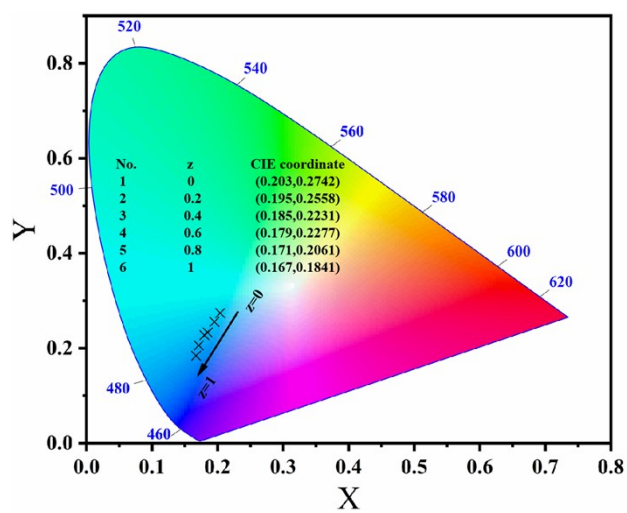

Fig. S4 The CIE chromaticity coordinate diagrams of SGGAO:0.01Bi<sup>3+</sup>(0≤z≤1) samples.

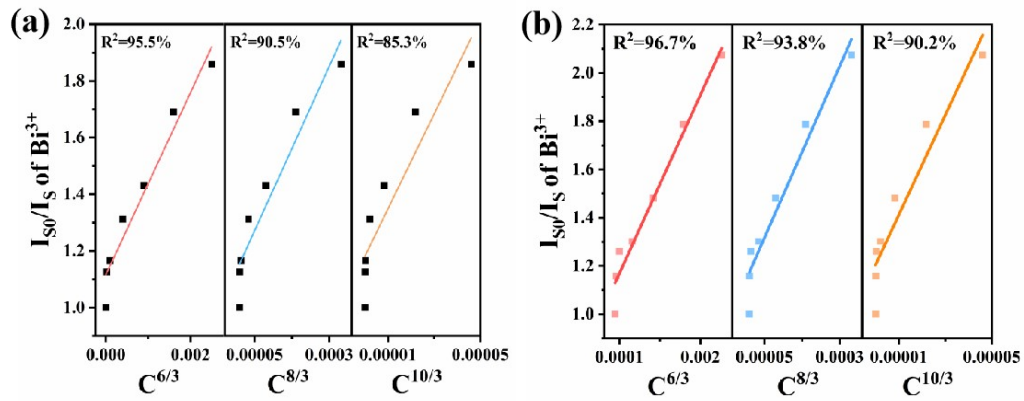

Fig. S5 Dependence  $I_{S0}/I_S$  of  $\text{Bi}^{3+}$  on  $C^{6/3}$ ,  $C^{8/3}$  and  $C^{10/3}$ : (a) SGGO:Bi<sup>3+</sup> and (b) SGGAO:Bi<sup>3+</sup>.

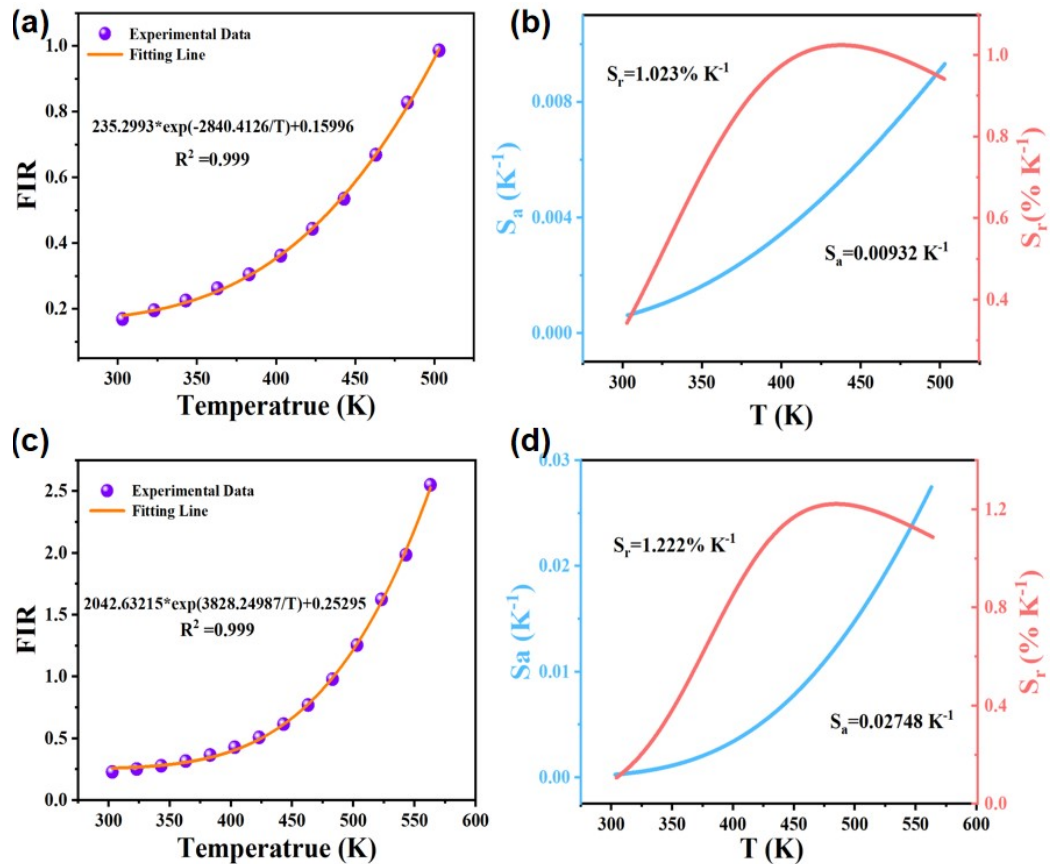

Fig. S6 (a,b) The FIR fitting curve of SGGO:0.01Bi<sup>3+</sup>,0.03Sm<sup>3+</sup> phosphor and its corresponding  $S_r$ ,  $S_a$  values. (c,d) The FIR fitting curve of SGGAO:0.01Bi<sup>3+</sup>,0.03Sm<sup>3+</sup> phosphor as well as its related  $S_r$ ,  $S_a$  values.

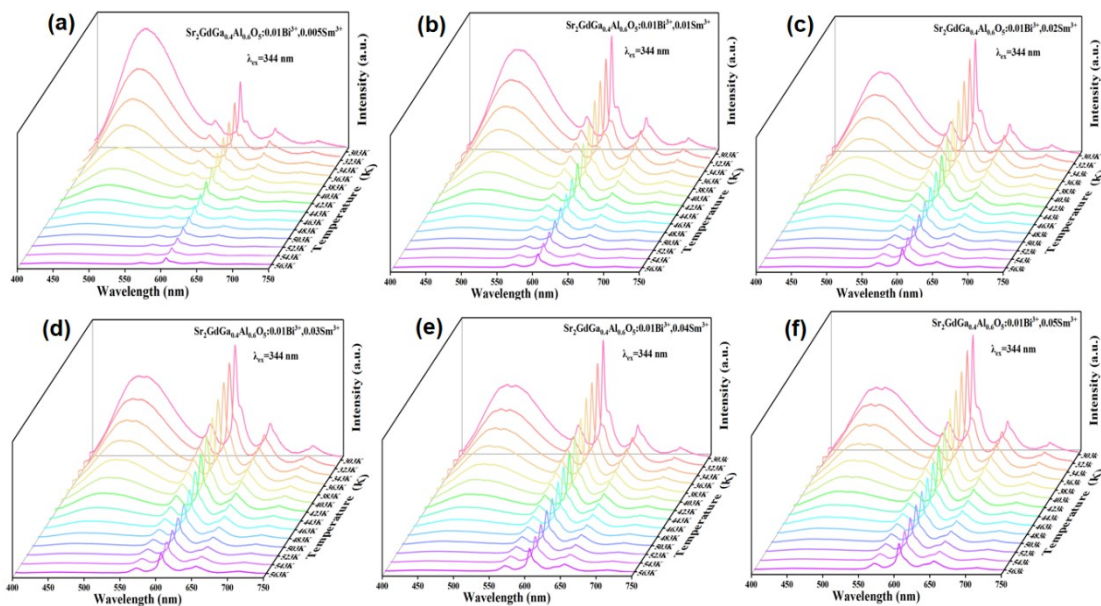

**Fig. S7** (a-f) The temperature-dependent PL spectra of SGGAO:0.01Bi<sup>3+</sup>,ySm<sup>3+</sup> (y=0.005, 0.01, 0.02, 0.03, 0.04, 0.05) phosphors.

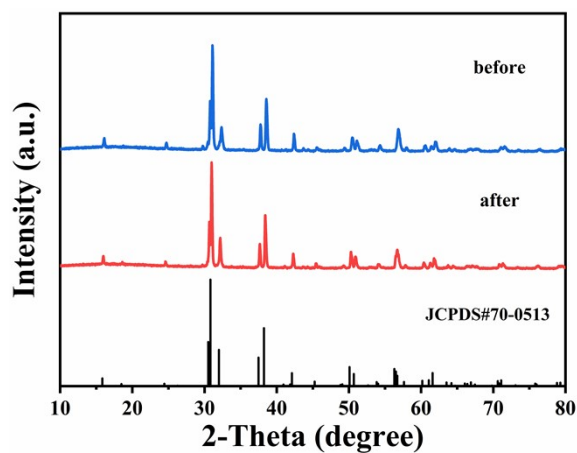

**Fig. S8** The XRD patterns of phosphors before and after five cycles.

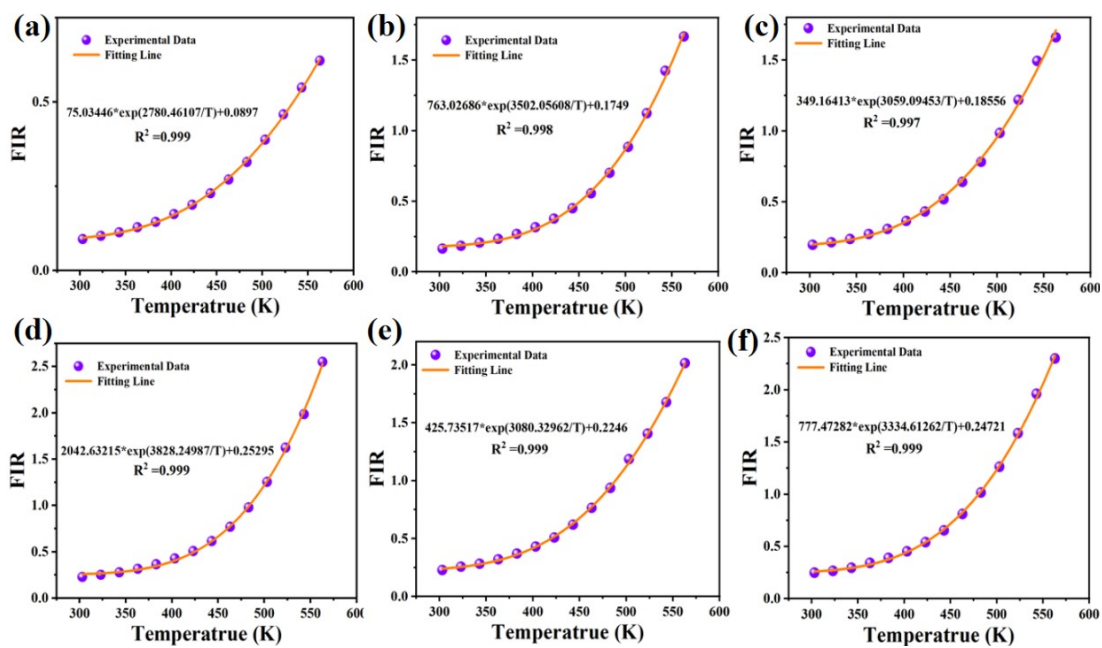

**Fig. S9** (a-f) The FIR fitting curve of SGGAO:0.01Bi<sup>3+</sup>,ySm<sup>3+</sup> (y=0.005, 0.01, 0.02, 0.03, 0.04, 0.05) phosphors.

**Table S1** The Rietveld refinement results of SGGAO phosphors.

| SGG <sub>1-z</sub> A <sub>z</sub> O | a[Å]   | b[Å]   | c[Å]    | v[Å <sup>3</sup> ] | R <sub>p</sub> [%] | R <sub>wp</sub> [%] | χ <sup>2</sup> |
|-------------------------------------|--------|--------|---------|--------------------|--------------------|---------------------|----------------|
| z=0                                 | 6.7747 | 6.7747 | 11.1830 | 513.2633           | 5.92               | 13.17               | 2.22           |
| z=0.2                               | 6.7605 | 6.7605 | 11.1346 | 508.9027           | 6.44               | 2.24                | 1.90           |
| z=0.4                               | 6.7552 | 6.7552 | 11.0840 | 505.7900           | 6.18               | 10.44               | 1.69           |
| z=0.6                               | 6.7451 | 6.7451 | 11.0321 | 501.9231           | 5.99               | 9.99                | 1.67           |
| z=0.8                               | 6.7406 | 6.7406 | 10.9877 | 499.2371           | 6.11               | 9.83                | 1.61           |
| z=1.0                               | 6.7398 | 6.7398 | 10.9331 | 496.6352           | 5.63               | 8.77                | 1.58           |

**Table S2** The comparison of maximum  $S_r$  among different materials with  $\text{Bi}^{3+}$ ,  $\text{RE}^{3+}$  co-doped.

| Compounds                                                                               | Temperature range(K) | $S_r(\text{max})(\% \text{ K}^{-1})$ | Ref.      |
|-----------------------------------------------------------------------------------------|----------------------|--------------------------------------|-----------|
| $\text{YNbO}_4: \text{Bi}^{3+}, \text{Sm}^{3+}$                                         | 303-463              | 1.57                                 | [1]       |
| $\text{LaNbO}_4: \text{Bi}^{3+}, \text{Sm}^{3+}$                                        | 303-483              | 1.36                                 | [2]       |
| $\text{BaGd}_2\text{O}_4: \text{Bi}^{3+}, \text{Sm}^{3+}$                               | 293-473              | 1.11                                 | [3]       |
| $\text{Sr}_3\text{La}_2\text{Ge}_3\text{O}_{12}: \text{Bi}^{3+}, \text{Eu}^{3+}$        | 293-573              | 0.83                                 | [4]       |
| $\text{SrLu}_2\text{O}_4: \text{Bi}^{3+}, \text{Eu}^{3+}$                               | 315-453              | 0.87                                 | [5]       |
| $\text{Sr}_2\text{YNbO}_6: \text{Bi}^{3+}, \text{Eu}^{3+}$                              | 313-573              | 0.89                                 | [6]       |
| $\text{Sr}_2\text{GdGaO}_5: \text{Bi}^{3+}, \text{Sm}^{3+}$                             | 303-503              | 1.02                                 | This work |
| $\text{Sr}_2\text{GdGa}_{0.4}\text{Al}_{0.6}\text{O}_5: \text{Bi}^{3+}, \text{Sm}^{3+}$ | 303-563              | 1.22                                 | This work |

## Reference

- [1] X. Tiana, H. Doua, L. Wub, Non-contact thermometry with dual-activator luminescence of  $\text{Bi}^{3+}/\text{Sm}^{3+}$ :  $\text{YNbO}_4$  phosphor, *Ceram. Int.*, 2020, **46**, 10641-10646.
- [2] J. Xue, Z. Yu, H. M. Noh, B. R. Lee, B. C. Choi, S. H. Park, J. H. Jeong, P. Du, M. Song, Designing multi-mode optical thermometers via the thermochromic  $\text{LaNbO}_4:\text{Bi}^{3+}/\text{Ln}^{3+}$  ( $\text{Ln} = \text{Eu}, \text{Tb}, \text{Dy}, \text{Sm}$ ) phosphors, *Chem. Eng. J.*, 2021, **415**, 128977
- [3] J. Fu, L. Zhou, Y. Chen, J. Lin, R. Ye, D. Deng, L. Chen, S. Xu. Dual-mode optical thermometry based on  $\text{Bi}^{3+}/\text{Sm}^{3+}$  co-activated  $\text{BaGd}_2\text{O}_4$  phosphor with tunable sensitivity, *J. Alloys Compd.*, 2022, **897**, 163034.
- [4] Y. Shen, Y. Chen, L. Chen, D. Deng, S. Xu, Dual emitting from  $\text{Bi}^{3+}/\text{Eu}^{3+}$  co-activated  $\text{Sr}_3\text{La}_2\text{Ge}_3\text{O}_{12}$  phosphor for optical thermometry, *Opt. Mater.*, 2021, **115**, 111036.
- [5] X. Chen, Z. Zheng, L. Teng, R. Wei, F. Hu, H. Guo, Self-calibrated optical thermometer based on luminescence from  $\text{SrLu}_2\text{O}_4:\text{Bi}^{3+}, \text{Eu}^{3+}$  phosphors, *RSC Adv.*, 2018, **8**, 35422-35428.
- [6] S. Xu, J. Lei, L. Li, J. Chen, L. Chen, H. Guo, Dual-mode optical thermometry of  $\text{Sr}_2\text{YNbO}_6:\text{Bi}^{3+}, \text{Eu}^{3+}$  phosphors designed by response surface methodology, *J. Lumin.*, 2023, **255**, 119615.
